1           **Aquatic and terrestrial organisms display contrasting life**  
2           **history strategies as a result of environmental adaptations**

3           Pol Capdevila<sup>1,2,\*</sup>, Maria Beger<sup>3,4</sup>, Simone P. Blomberg<sup>5</sup>, Bernat Hereu<sup>2</sup>,  
4           Cristina Linares<sup>2</sup> & Roberto Salguero-Gómez<sup>1,4,6</sup>

5           <sup>1</sup> Department of Zoology, Oxford University, 11a Mansfield Road, Oxford, OX1 3SZ, UK.

6           <sup>2</sup> Departament de Biologia Evolutiva, Ecologia i Ciències Ambientals and Institut de Recerca de  
7           la Biodiversitat (IRBIO), Universitat de Barcelona, Avda Diagonal 643, 08028 Barcelona, Spain.

8           <sup>3</sup> School of Biology, Faculty of Biological Sciences, University of Leeds, Leeds LS3 9JT, UK.

9           <sup>4</sup> Centre for Biodiversity and Conservation Science, School of Biological Sciences, The  
10           University of Queensland, Brisbane, QLD 4072, Australia.

11           <sup>5</sup> School of Biological Sciences, The University of Queensland, Brisbane, QLD 4072, Australia.

12           <sup>6</sup> Evolutionary Demography Laboratory, Max Planck Institute for Demographic Research,  
13           Rostock 18057, Germany.

14           \*Corresponding author: [pcapdevila.pc@gmail.com](mailto:pcapdevila.pc@gmail.com)

15

16 **Abstract**

17 Aims: Aquatic and terrestrial realms display stark differences in key  
18 environmental factors and phylogenetic composition. Despite such differences,  
19 their consequences for the evolution of species' life history strategies remain  
20 poorly understood. Here, we examine whether and how life history strategies  
21 vary between terrestrial and aquatic species.

22 Location: Global.

23 Time period: Variable, the earliest year being in 1906 and the most recent in  
24 2015.

25 Major taxa studies: Macroscopic animals and plants species.

26 Methods: We use demographic information for 638 terrestrial and 117 aquatic  
27 animal and plant species, to derive key life history traits capturing their  
28 population turnover, and investments in survival, development, and  
29 reproduction. We use phylogenetically corrected least squares regression to  
30 explore the differences in the trade-offs between life history traits in both  
31 realms. We then quantify the life history strategies of aquatic and terrestrial  
32 species using a phylogenetically corrected principal component analysis.

33 Results: We find that the same trade-offs structure terrestrial and aquatic life  
34 histories, resulting in two dominant axes of variation describing species' pace-  
35 of-life and reproductive spread through time. Life history strategies differ  
36 between aquatic and terrestrial environments, with phylogenetic relationships  
37 playing a minor role. We show that adaptations of plants and animals to  
38 terrestrial environments have resulted in different life history strategies,  
39 particularly with their reproductive mode and longevity. Terrestrial plants display

40 a great diversity of life history strategies, including the species with the longest  
41 lifespans. Aquatic animals, on the contrary, exhibit higher reproductive  
42 frequency than terrestrial animals, likely due to reproductive adaptations (i.e.  
43 internal fecundation) of the later to land.

44 Main conclusions: Our findings show that aquatic and terrestrial species are  
45 ruled by the same life history principles, but have evolved different strategies  
46 due to distinct selection pressures. Such contrasting life history strategies have  
47 important consequences for the conservation and management of aquatic and  
48 terrestrial species.

49 *Keywords:* Aquatic–terrestrial comparisons, comparative demography, fast-slow  
50 continuum, life history trait, matrix population model, phylogenetic inertia

51

## 52 Introduction

53 The rich diversity of life history strategies worldwide stem from three  
54 fundamental demographic building blocks: survival, development, and  
55 reproduction (Stearns, 1992). The life histories that emerge from the  
56 combination of these three processes determine the viability of populations  
57 (Salguero-Gómez *et al.*, 2016b; McDonald *et al.*, 2017) and guide the  
58 effectiveness of conservation plans (Paniw *et al.*, 2019). However, despite the  
59 growing body of literature in life history theory (Lande *et al.*, 2017), few studies  
60 have explicitly contrasted their validity across terrestrial and aquatic organisms  
61 (Webb, 2012).

62 Life history theory predicts that any strategy is shaped by two counter-  
63 acting forces: environmental filtering and phylogenetic inertia (Stearns, 1992).  
64 Regarding the former, existing environmental differences between aquatic and  
65 terrestrial realms (e.g., water density and viscosity) could have produced  
66 divergences in their respective life history strategies (Dawson & Hamner, 2008;  
67 Webb, 2012; Gearty *et al.*, 2018). Under phylogenetic inertia (Freckleton, 2000;  
68 Blomberg & Garland, 2002), life history strategies are expected to be more  
69 similar, irrespective of environment, amongst closely related lineages

70 Life history theory is rooted upon the concept of trade-offs as an unifying  
71 principle across the tree of life and realms (Stearns, 1992). This body of  
72 literature predicts that, due to limitations in available energy and physiological  
73 constraints, compromises among survival, development, and reproduction are  
74 inescapable (Stearns, 1992). Such constraints are expected to result in a finite  
75 set of viable demographic schedules. Indeed, comparative demographic studies  
76 have successfully identified and organised them into a few major axes of trait

77 co-variation (Gaillard *et al.*, 1989; Salguero-Gómez *et al.*, 2016b). A seminal  
78 concept in organising such a trait co-variation is the “fast-slow continuum”  
79 (Stearns, 1992). In it, species are organised along two extremes: at the fast-  
80 living extreme, species develop fast, become highly reproductive, but die young  
81 (e.g. *Bromus tectorum* [cheatgrass], Griffith, 2010; planktonic species,  
82 Reynolds, 2006); while at the slow extreme, species develop slowly, live long,  
83 and reproduce rarely and late in life (e.g. *Somniosus microcephalus*, the  
84 Greenland shark, Nielsen *et al.*, 2016; *Pinus longaeva*, the Bristlecone pine,  
85 Peñuelas & Munné-Bosch, 2010). However, an explicit comparison of the fast-  
86 slow continuum between aquatic and terrestrial species remains, to our  
87 knowledge, untested.

88         Based on the strong environmental and phylogenetic differences  
89 between aquatic and terrestrial realms, life history strategies should differ  
90 between both realms. Life was originated on the sea, and the land colonisation  
91 resulted in a great divergence of the biodiversity patterns observed in both  
92 realms (Grosberg *et al.*, 2012; Costello & Chaudhary, 2017). There is a higher  
93 richness of species on land (~80%), while aquatic biota are more diverse at the  
94 phylum level (~34) than the terrestrial realm (~15) (Costello & Chaudhary,  
95 2017). Also, land colonisation required adaptations to: the effects of gravity on  
96 body structures, avoid desiccation, the elimination of waste products, together  
97 with other processes (see reviews in Grosberg *et al.*, 2012; Webb, 2012). For  
98 example, early life stages can feed and develop during dispersal in aquatic  
99 environments (Burgess *et al.*, 2016; Bush *et al.*, 2016; Vermeij & Grosberg,  
100 2017), but terrestrial species had to evolve reproductive systems independent

101 to environmental water, such as internal fecundity or seeds (Grosberg *et al.*,  
102 2012; Bush *et al.*, 2016; Steele *et al.*, 2019).

103 The colonisation of land likely resulted in the evolution of life histories to  
104 deal with higher temporal environmental variability (Dawson & Hamner, 2008;  
105 Ruokolainen *et al.*, 2009). On land environmental variation is more random and  
106 less auto-correlated than in aquatic environments (Ruokolainen *et al.*, 2009).  
107 Classical life history theory predicts the evolution of longevity in constant  
108 environments (Lande *et al.*, 2017). However, there is recent evidence that  
109 longevity can be an strategy to deal with environmental variation (Morris *et al.*,  
110 2008; McDonald *et al.*, 2017). On the other hand, fast life histories, are  
111 expected to show increasing fluctuations in population sizes with increasing  
112 environmental variation (Morris *et al.*, 2008; McDonald *et al.*, 2017). For that  
113 reason, some authors have argued that the colonization of land resulted in the  
114 evolution of longer lifespans to smooth out the short-term but large-amplitude  
115 terrestrial environmental fluctuations (*sensu* Steele *et al.*, 2019).

116 Here, we test the hypothesis that (i) trade-offs are universal both in  
117 aquatic and terrestrial systems, and (ii) that terrestrial species have evolved  
118 different life history strategies compared to aquatic ones. We use high-  
119 resolution demographic data from 117 aquatic and 638 terrestrial species  
120 across the globe from the COMPADRE and COMADRE databases (Salguero-  
121 Gómez *et al.*, 2015, 2016a). We estimate key life history traits capturing  
122 population turnover, and investments in survival, development, and  
123 reproduction of those species. To test these hypotheses, we first determine  
124 whether correlations between life history traits differ across realms as a way to  
125 examine whether trade-offs diverge between terrestrial vs. aquatic species.

126 Second, we explore the main axes of life history variability shaping aquatic and  
127 terrestrial species. The presence of different life history axes of variation and/or  
128 a distinct positioning of aquatic species compared to terrestrial ones within  
129 those axes would suggest dissimilar selection pressures occurring above and  
130 below water. Given the scarcity of trans-realm comparative studies and the lack  
131 of demographic information for many aquatic species, elucidating these  
132 questions is a key step forward towards understanding the evolution of life  
133 histories across realms.

## 134 **Material and Methods**

### 135 *Demographic data and life history traits*

136 We calculated species' life history strategies using demographic data describing  
137 information across the full life cycle of each species. This high-quality  
138 demographic information was obtained from the COMPADRE Plant Matrix  
139 Database (v. 5.0.1; Salguero-Gómez *et al.*, 2015) and COMADRE Animal  
140 Matrix Database (v. 3.0.1; Salguero-Gómez *et al.*, 2016a). In them, the  
141 demographic data is archived into matrix population models (MPMs, hereafter)  
142 for over 700 plant and 400 animal species, respectively. MPMs are summaries  
143 of organisms' demographic processes (*i.e.*, vital rates) that together determine  
144 their life history strategies and resulting population dynamics (Caswell, 2001).  
145 For this reason, MPMs provide the ideal means to compare the vast array of life  
146 history strategies (Franco & Silvertown, 2004; McDonald *et al.*, 2017).

147 To compare life history traits across aquatic and terrestrial species, we  
148 imposed a series of selection criteria to the available demographic data (see  
149 details in Appendix S2: Data selection in Supporting information). These criteria

150 resulted in 638 terrestrial species and 117 aquatic species used in this study  
151 (Appendix S1). We also classified aquatic vs terrestrial species according to the  
152 information provided in the World's Register of Marine Species  
153 ([www.marinespecies.org](http://www.marinespecies.org)) and the Catalogue of Life  
154 (<http://www.catalogueoflife.org>). The number of species studied here  
155 represented a similar taxonomic coverage relative to the known biodiversity of  
156 the aquatic (~0.05%) and terrestrial realm (~0.01%; Table S1 in Appendix S2).

157 Quantifying a species' life history strategy requires detailed information  
158 regarding the timing, intensity, frequency, and duration of key demographic  
159 processes across its life cycle (Stearns, 1992). To quantify species' life history  
160 strategies, we calculated several life history traits from each MPM that are *a*  
161 *priori* not correlated using well-established methods (Salguero-Gómez *et al.*,  
162 2016b). We selected seven life history traits commonly used in comparative  
163 demography (Stearns, 1992; Gaillard *et al.*, 2005; Bielby *et al.*, 2007; Salguero-  
164 Gómez *et al.*, 2016). These traits include: generation time ( $T$ ), age at sexual  
165 maturity ( $L_a$ ), rate of senescence ( $H$ ), mean vital rate of progressive  
166 development ( $\gamma$ ), the mean vital rate of sexual reproduction ( $\phi$ ) and degree of  
167 iteroparity ( $S$ ) (Table S2). Such traits provide insights of the species' population  
168 turnover, as well as of survival, developmental, and reproductive strategies  
169 (detailed in Table S2 in Appendix S2).

#### 170 *Phylogenetic analyses and trait comparisons*

171 We accounted for and estimated the phylogenetic influence on the differences  
172 in life history trait values within species and between aquatic vs. terrestrial  
173 realms. To do so, we constructed a species-level phylogenetic tree (Figure S2  
174 in Appendix S3) with data from Open Tree of Life (OTL,



175 <https://tree.opentreeoflife.org>. Hinchliff *et al.*, 2015). OTL combines publicly  
176 available taxonomic and phylogenetic information across the tree of life  
177 (Hinchliff *et al.*, 2015). Briefly, we built separate trees for our species of algae,  
178 plant, and animals, using the *rotl* R package (Michonneau *et al.*, 2016), which  
179 were assembled in a supertree using the function *bind.tree* in the *phytools*  
180 package (Revell, 2012). To account for the phylogenetic relatedness of species  
181 we computed the branch lengths and resolved polytomies (Revell, 2012). We  
182 also tested the sensitivity of our results to the choice of a particular set of  
183 branch lengths, by repeating our analyses setting all the branch lengths to one  
184 and using Pagel's branch length (Tables S4-S7 in Appendix S3) using the  
185 software Mesquite 1.05 (Maddison & Maddison, 2001) and its PDAP module  
186 1.06 (Midford *et al.*, 2005). For further details on the construction of the tree see  
187 Appendix S3.

188         To test whether life history trait trade-offs are congruent between aquatic  
189 vs. terrestrial species, we carried out a series of Phylogenetic General Least  
190 Square (PGLS) analyses (Revell, 2010). This approach allows us to  
191 accommodate residual errors according to a variance-covariance matrix that  
192 includes ancestral relationships between any pair of species from our  
193 phylogenetic tree (Revell, 2010, 2012). We implemented our set of PGLSs in R  
194 using the correlation structures provided by the package *ape* (Paradis *et al.*,  
195 2004). We used a Brownian motion model of evolution (BM), combined with the  
196 *pgls* function from the *nlme* package (Pinheiro *et al.*, 2014). Separate PGLSs  
197 were fitted using Ornstein Uhlenbeck (OU) model of evolution, which describes  
198 Brownian model under the influence of friction (Uhlenbeck & Ornstein, 1930).  
199 Both models were compared using Akaike Information Criterion (Akaike,

200 1974); the BM generally outperformed the OU model, but both showed similar  
201 results. Therefore, we only report the PGLS results from the Brownian motion  
202 model.

### 203 *Exploring dominant axes of life history strategies*

204 To explore the patterns of association among life history traits for aquatic vs.  
205 terrestrial species, we performed a series of principal components analyses  
206 (PCA). PCA is a multivariate analysis that reduces a set of correlated variables  
207 into linearly uncorrelated measurements, the so-called principal components  
208 (PCs). Life history trait data were log- and z-transformed (mean=0, SD=1) to  
209 fulfil normality assumptions of PCAs (Legendre & Legendre, 2012). Finally, we  
210 identified and excluded outliers for each life history trait as those located outside  
211 of the 2.5<sup>th</sup>-97.5<sup>th</sup> percentile range of the distribution. However, we note that the  
212 exclusion of outliers did not alter our main findings (see Tables S8-S11 in  
213 Appendix S4).

214 To account for shared ancestry while exploring differences in aquatic vs.  
215 terrestrial life history strategies, we used a phylogenetically informed PCA  
216 (pPCA Revell, 2009). The pPCA considers the correlation matrix of species'  
217 traits while accounting for phylogenetic relationships and simultaneously  
218 estimating Pagel's  $\lambda$  with maximum likelihood methods. Pagel's  $\lambda$  quantifies the  
219 strength of the phylogenetic relationships on trait (co-)evolution under a BM  
220 (Freckleton, 2000; Blomberg & Garland, 2002). This metric varies between 0  
221 when the observed patterns are not due to phylogenetic relationships, and 1  
222 when the observed patterns can be explained by the employed phylogeny  
223 (Blomberg & Garland, 2002; Revell, 2010). The pPCA was estimated using the

224 phyl.pca function from the R package *phytools* (Revell, 2012), assuming a BM  
225 (Revell, 2010).

226 A full dataset (*i.e.*, no missing values) is necessary to run the pPCA  
227 analyses. However, estimating life history traits for species' MPMs was not  
228 always possible (see *Missing data* in Appendix S2: Extended methods). For  
229 example, we could not calculate the rate of senescence for *Fucus vesiculosus*.  
230 The rate of senescence (Keyfitz's entropy) can only be calculated for life tables  
231 that have not reached stationary equilibrium before the 95% of a cohort are  
232 dead (Caswell, 2001; Jones *et al.*, 2014), which was not the case for this  
233 species. In these cases, we imputed the missing data using function *amelia*  
234 from the *Amelia* package (Honaker *et al.*, 2011). This function uses a bootstrap  
235 EM algorithm to impute missing data. We then created 10 imputed datasets and  
236 ran analyses on each separately. In addition, we tested the sensitivity of our  
237 results to missing traits in the dataset using pPCA in two ways. First, we ran a  
238 pPCA only with species without any missing data (62 aquatic species, 477  
239 terrestrial species, Tables S10 and S11 in Appendix S4), and with missing  
240 species trait values filled using imputation methods (see Tables S8, S9, S12  
241 and S13 in Appendix S4). The results from the multiple imputations were  
242 presented as their respective mean values with their standard deviation. To test  
243 the differences between the distributions of pPCA scores between realms, we  
244 used the mean position resulting from the multiple imputations.

245 We also examined the consistency of our results and explored the  
246 differences between realms by performing the pPCA analyses on different  
247 subsets of data. These subsets included comparisons between mobile vs.  
248 sessile organisms, Animalia vs. Plantae/Chromista kingdoms, and aquatic vs.

249 terrestrial realms. We considered sessile species as those that do not have  
250 active locomotion during the adult stages of their life cycle (e.g. corals, sponges,  
251 plants) and those species with limited adult locomotion (e.g. clams, worms,  
252 snails). This distinction was made because key traits (e.g. reproduction,  
253 development, energetic requirements) can differ between sessile and mobile  
254 organisms (Bush *et al.*, 2016; Vermeij & Grosberg, 2017). We also performed a  
255 series of pPCA analyses sub-setting species into Animalia kingdom, and  
256 Plantae and Chromista (brown algae). This distinction was also made because  
257 animals and plants/algae differ in key physiological, trophic and development  
258 traits (Grosberg *et al.*, 2012; Burgess *et al.*, 2016). Such ecological differences  
259 between sessile/mobile and taxonomic kingdoms, could have a potential impact  
260 on our hypothesis about the different evolution of life history strategies in  
261 aquatic and terrestrial species.

## 262 **Results**

### 263 *Trade-offs are pervasive across realms*

264 Life history traits are shaped by the same trade-offs below water as on land  
265 (Figure 1). Our PGLS analyses reveal a similar magnitude and the same  
266 direction of pair-wise correlations between traits for aquatic and for terrestrial  
267 species (Figure 1 and Tables S9, S11 and S13 in Appendix S4). Regardless of  
268 the realm, producing many recruits (high  $\phi$ ; Table S2 in Appendix S2) results in  
269 fast population turnover (low  $T$ ). Likewise, species that postpone their first  
270 reproductive event (high  $L_a$ ) have low senescence rates (high  $H$ ) (Figure 1).  
271 Species with fast development (high  $\gamma$ ) achieve reproductive maturity early (low  
272  $L_a$ ) at the cost of high senesce rates (low  $H$ ). Also, those species high

273 reproductive output (high  $\varphi$ ) and frequent reproduction (high  $S$ ), have low  
274 senescence rates (high  $H$ ) (Figure 1).

275 *Aquatic species are faster than terrestrial ones*

276 Together, the first two axes of our phylogenetically corrected principal  
277 component analysis (pPCA; Table 1) explain over 60% of the examined  
278 variation in life history traits (Figure 2, Table 1). Principal component axis 1  
279 (PC1) explains  $47.42 \pm 0.34\%$  (Mean  $\pm$  S.E.) of the variation and represents the  
280 fast-slow continuum. Indeed, PC1 portrays a trade-off between species with fast  
281 development and short lifespans, and slow development, high investment in  
282 survival (low senescence rates), and postponement of maturity (Figure 2). PC2  
283 explains  $21.02 \pm 0.11\%$  of the variation in life history traits related to reproductive  
284 strategies. In PC2, those species characterised by high reproductive rate and  
285 high iteroparity are located at the top vs. species with fewer reproductive events  
286 across their lifetimes, located at the bottom of Figure 2. These patterns are  
287 robust within different life modes (Figure 3a,b and Table S14 in Appendix S4),  
288 kingdoms (Figure 3c,d and Table S15 in Appendix S4), and realms (Table S16  
289 in Appendix S4).

290 Aquatic life history strategies are displaced towards the fast extreme of  
291 the fast-slow continuum ( $t_{197,49} = -6.22$ ,  $P < 0.01$ ; Figure 2). On land, the studied  
292 species occupy fast paces of life, such as *Solidago mollis* (soft goldenrod),  
293 *Setophaga cerulean* (cerulean warbler), as well as slow ones, such as  
294 *Pseudomitrocereus fulviceps* (the giant cardon). In the aquatic realm, in  
295 contrast, the resulting paces of life are constrained to faster values compared to  
296 terrestrial species (PC1, Figure 2). In contrast, aquatic organisms are not  
297 displaced towards any of the extremes of the PC2. Both aquatic and terrestrial

298 species show a wide range of reproductive strategies, with highly reproductive  
299 species such as such as *Lantana camara* (big-sage) or *Gracilaria gracilis* (red  
300 seaweed), and species less reproductive species, such as *Mirounga leonina*  
301 (southern elephant seal) and *Gorilla beringei* (eastern gorilla). There are no  
302 significant differences between the realms in the PC2 ( $t_{215.04}= 0.18$ ,  $P=0.86$ ;  
303 Figure 2).

#### 304 *Mode-of-life and kingdom drive key life history differences across realms*

305 The main axes of life history variation remain unaltered across realms, modes-  
306 of-life (whether species are mobile or sessile during their adulthood) or  
307 taxonomic affiliation. The first and second axes of life history trait variation  
308 correspond to the fast-slow continuum and reproductive strategies in both  
309 sessile and mobile species (Figure 3a,b and Table S14 in Appendix S4), in  
310 Animalia and Plantae/Chromista kingdoms (Figure 3c,d and Table S15 in  
311 Appendix S4), in terrestrial species and aquatic species (Table S16 in Appendix  
312 S4).

313 Aquatic and terrestrial sessile species display significant differences in  
314 their position across first axes of life history variation. Aquatic sessile species  
315 are displaced towards the fast end (*i.e.*, low PC1 scores) of the fast-slow  
316 continuum ( $t_{64.91}=-53.32$ ,  $P<0.01$ ; Figure 3a). Aquatic sessile species do not  
317 show significant differences in their reproductive strategies compared to  
318 terrestrial ones ( $t_{59.22}=1.95$ ,  $P=0.06$ ; Figure 3a). In contrast, mobile aquatic  
319 species are not displaced towards any end of the fast-slow continuum when  
320 compared to terrestrial mobile species ( $t_{96.34}=0.55$ ,  $P=0.58$ ; Figure 3b), neither  
321 in the reproductive axis ( $t_{118.88}=1.84$ ,  $P=0.07$ ; Figure 3b).

322 Terrestrial plants have a wide range of life history strategies with no  
323 significant displacement in the pace-of-life axis ( $t_{9.52}=-1.16$ ,  $P=0.27$ ; Figure 3c)  
324 neither in the reproductive strategies' axis ( $t_{9.16}=0.25$ ,  $P=0.81$ ; Figure 3c). In  
325 contrast, animals do not show any significantly displaced towards any end of  
326 the fast-slow continuum ( $t_{199.08}=0.74$ ,  $P=0.46$ ; Figure 3d). In contrast, aquatic  
327 animals are significantly displaced towards the upper end of the reproductive  
328 axis compared to their terrestrial counterparts ( $t_{208.60}= 4.27$ ,  $P<0.01$ ; Figure 3d).

### 329 *Ancestry does not shape cross-realm life history strategies*

330 Overall, phylogenetic ancestry (*i.e.*, phylogenetic inertia) plays a minor role in  
331 constraining life history strategies between realms. The estimates of Pagel's  $\lambda$   
332 in our pPCA are indeed low ( $0.26\pm 0.00$ ). Such values of the phylogenetic signal  
333 remain low across sessile ( $\lambda=0.18\pm 0.01$ ; Table S14 in Appendix S4), mobile  
334 species ( $\lambda=0.36\pm 0.01$ ; Table S14 in Appendix S4), plants and algae  
335 ( $\lambda=0.18\pm 0.01$ ; Table S15 in Appendix S4) and animals ( $\lambda=0.31\pm 0.02$ ; Table S15  
336 in Appendix S4). In addition, the phylogenetic signal is similar between  
337 terrestrial ( $\lambda=0.24\pm 0.01$ ; Table S16 in Appendix S4) and aquatic species  
338 ( $\lambda=0.19\pm 0.02$ ; Table S16 in Appendix S4).

339 For both aquatic and terrestrial species, reproductive traits ( $\square$  and S in  
340 Table S2) are systematically more labile (*i.e.*, lower phylogenetic signal) than  
341 traits associated to survival ( $H$ ,  $L_a$ ), development ( $\gamma$ ) or turnover ( $T$ ). Generation  
342 time ( $T$ ) and age at reproductive maturity ( $L_a$ ) are strongly phylogenetically  
343 associated with the number of recruits produced ( $\square$ ) and the degree of  
344 iteroparity (S)(Fig.1). The traits with the highest loading on the fast-slow  
345 continuum ( $T$ ,  $H$  and  $L_a$ ) are strongly phylogenetically linked to two leading traits  
346 of the reproductive-strategies axis ( $\square$  and S). Equally, the variation on age at

347 maturity ( $L_a$ ) is largely explained by its phylogenetic association with  
348 developmental rates ( $\gamma$ ) (Figure 1).

### 349 **Discussion**

350 Our comparison of 117 aquatic and 638 terrestrial species demonstrates that  
351 life history strategies are organised along the same dominant axes of variation  
352 and constrained by the same trade-offs, regardless of realm. The sampled  
353 aquatic species have not evolved the high longevities attained by some of our  
354 studied terrestrial species, but those aquatic animals are more reproductive  
355 than the terrestrial ones. The relatively weak phylogenetic signal in our analyses  
356 suggest that these key life history differences are not explained by the  
357 differential taxonomic composition of both realms (Freckleton, 2000; Blomberg  
358 & Garland, 2002). Overall, we suggest that the contrasting environmental  
359 conditions between aquatic and terrestrial realms may play a major role in the  
360 observed life history patterns and differences.

361 We show greater diversity of life history strategies on land compared to  
362 aquatic environments. This finding is congruent with the higher species richness  
363 (Costello & Chaudhary, 2017) and larger range of species biomass housed in  
364 the terrestrial realm (Bar-On *et al.*, 2018). The colonisation of land established a  
365 period of unparalleled innovations in the evolution of plants and animals, driven  
366 by challenges in water retention, mobility, and dispersal (Steele *et al.*, 2019).  
367 Adaptations like plant vascularity, and animal terrestrial mobility were key for  
368 the proliferation of populations and species diversification (Steele *et al.*, 2019).  
369 These innovations allowed the exploitation of novel ecological niches, ultimately  
370 resulting in a six-fold increase in speciation rate (Costello & Chaudhary, 2017).



371 We argue that such adaptations are reflected in the vast diversity of life histories  
372 observed in the terrestrial realm relative to that in the aquatic realm in our study.

373         Nevertheless, plants and animals evolved different sets of adaptations to  
374 terrestrial and aquatic environments (Burgess *et al.*, 2016; Steele *et al.*, 2019),  
375 resulting in distinct life history strategies too. Terrestrial plants account for most  
376 of the diversity of life histories observed in our study, but they show slower  
377 strategies than aquatic species. Slow life history strategies can buffer  
378 environmental variation compensating the uncertainties of reproductive success  
379 through high adult survival (Morris *et al.*, 2008; McDonald *et al.*, 2017), and  
380 have been suggested as an adaptation of plants to terrestrial environments  
381 (Steele *et al.*, 2019). Such a pattern, however, is not shared with terrestrial  
382 animals, which do not show any displacement towards any extreme of the fast-  
383 slow continuum, compared to aquatic animals. In contrast, terrestrial animals  
384 could have compensated environmental uncertainties through the evolution of  
385 complex behaviours (e.g. societies, nesting) and physiological adaptations (e.g.  
386 thermoregulation, internal fecundation) (Grosberg *et al.*, 2012; Steele *et al.*,  
387 2019).

388         A major challenge for land colonisation is reproducing in a non-aquatic  
389 environment (Grosberg *et al.*, 2012; Burgess *et al.*, 2016), influencing the  
390 evolution of divergent life history strategies. External fertilisation is the  
391 predominant reproductive strategy in aquatic environments (Bush *et al.*, 2016).  
392 Aquatic colonisers to land environments had to evolve strategies to protect early  
393 stages (e.g. to desiccation) and enable their development in non-aquatic  
394 environments (Strathmann, 1990; Burgess *et al.*, 2016; Steele *et al.*, 2019).  
395 Plants, like many benthic aquatic species, have a sessile adulthood, so their

396 dispersal is in early developmental stages only. This life-mode promoted the  
397 evolution of flowers, pollination and seeds (Kenrick & Crane, 1997), resulting in  
398 the observed high reproductive outputs and frequencies in plants, despite the  
399 fact that they can also reach high longevities (e.g. Salguero-Gómez *et al.*,  
400 2016b; McDonald *et al.*, 2017).

401 On the other hand, the colonisation of land constrained animal  
402 reproduction to internal fertilisation, with a consequent decrease in reproductive  
403 outputs and frequency. Again, we argue that this finding is likely linked to the  
404 prevalence of external fertilisation in the ocean compared to the terrestrial realm  
405 (Bush *et al.*, 2016). Both viscosity and nutrient concentration are higher in  
406 seawater than in air (Dawson & Hamner, 2008), allowing propagules to remain  
407 suspended for long periods of time (Strathmann, 1990; Burgess *et al.*, 2016).  
408 The release of progeny in the water column comes with a high early predation  
409 risk and low establishment probability and high early mortality (Strathmann,  
410 1990; Burgess *et al.*, 2016). To compensate such early mortality, aquatic  
411 species release high numbers of propagules and frequently, resulting in highly  
412 reproductive life histories. In contrast, most terrestrial animals retain female  
413 gametes on or in their bodies, and fertilisation and early development are  
414 usually internal (Bush *et al.*, 2016; Steele *et al.*, 2019), resulting in less  
415 reproductive strategies. Still, there are aquatic species that have internal  
416 fecundity, such as some sharks or marine mammals (Steele *et al.*, 2019),  
417 explaining the range of reproductive strategies observed in our study.

418 Although the volume of data used in our study has a similar ratio to that  
419 of the biodiversity held in aquatic vs. terrestrial realms (~0.01%; Table S1 in  
420 Appendix S1), it still represents a limited fraction of the known diversity

421 (Grosberg *et al.*, 2012; Costello & Chaudhary, 2017). Importantly, here we have  
422 focused mostly on macroscopic organisms, for which full demographic  
423 information is more readily available than for small species (Salguero-Gómez *et al.*,  
424 2015, 2016a). Organisms like insects, but also microscopic organisms, such  
425 as plankton or bacteria, are challenging subjects for demographic studies, so  
426 their data are very scarce (Salguero-Gómez *et al.*, 2016a; Conde *et al.*, 2019).  
427 In addition, recently discovered extremely long-lived marine species (e.g.  
428 *Somniosus microcephalus*, Nielsen *et al.*, 2016; *Monorhaphis chuni*, Jochum *et al.*,  
429 2012) are likely examples of slow strategies for which we do not yet have  
430 complete demographic data. Thus, the increase of studies quantifying the  
431 demographic processes of the full life cycle of species will likely shed more light  
432 on the differences between aquatic and terrestrial life histories.

433 In this study, we used demography as the common currency to quantify  
434 the life history strategies of species. Species life history strategies are highly  
435 determined by the demographic processes of survival, development and  
436 reproduction (Stearns, 1992; Caswell, 2001). Researchers quantifying life  
437 history strategies have used different approaches to compare species (e.g.  
438 fishes in Winemiller & Rose, 1992; plants in Westoby, 1998; Grime & Pierce,  
439 2012). These approaches have significantly contributed to improve our current  
440 understanding of life history strategies both in terrestrial and aquatic realms  
441 (Grime & Pierce, 2012). However, in some cases, these approaches use taxon-  
442 specific traits (such as the leaf–height–seed strategy scheme by Westoby,  
443 1998), which would not allow us to compare across different taxonomic groups,  
444 such as animals and plants. For that reason, demographic data quantifying  
445 important moments of the life cycle of species (Salguero-Gómez *et al.*, 2016b),

446 provides the ideal means to compare strategies across very different and  
447 distant taxonomic groups. Importantly, we also demonstrate that considering  
448 incomplete demographic information (e.g. only survival investments) can lead to  
449 the inaccurate characterisation of the life history strategy of a given species.  
450 Information on the pace-of-life explains the life history variation of about 52.52%  
451 of aquatic and 49.05% of terrestrial species. Typically lacking reproductive  
452 information, which is much more challenging to collect than to estimate survival,  
453 prevents us from improving our understanding by 21.61% and 21.35%, of  
454 aquatic and terrestrial species respectively.

455 Overall, our study provides a promising entry-point to trans-realm  
456 comparative biology. Our findings evidence the existence of strong differences  
457 between the life history strategies of aquatic and terrestrial systems as a  
458 consequence of the colonization of land environments. Such contrasting life  
459 history strategies are probably linked to the distinct responses to climate  
460 change (Pinsky *et al.*, 2019), exploitation (McCauley *et al.*, 2015) or extinction  
461 rates (Webb & Mindel, 2015) observed in aquatic and terrestrial systems.  
462 Understanding how the contrasting patterns of life histories translate into  
463 differences in their response to disturbances will be crucial to improve  
464 management decisions and predict future biodiversity trends.

465

466

## 467 References

- 468 Akaike, H. (1974) A new look at the statistical model identification. *IEEE*  
469 *Transactions on Automatic Control*, **19**, 716–723.
- 470 Bar-On, Y.M., Phillips, R. & Milo, R. (2018) The biomass distribution on Earth.  
471 *Proceedings of the National Academy of Sciences*, 201711842.
- 472 Blomberg, S.P. & Garland, T. (2002) Tempo and mode in evolution: the  
473 phylogenetic inertia, adaptation and comparative methods. *Journal of*  
474 *Evolutionary Biology*, **15**, 899–910.
- 475 Burgess, S.C., Baskett, M.L., Grosberg, R.K., Morgan, S.G. & Strathmann, R.R.  
476 (2016) When is dispersal for dispersal? Unifying marine and terrestrial  
477 perspectives. *Biological Reviews*, **91**, 867–882.
- 478 Bush, A.M., Hunt, G. & Bambach, R.K. (2016) Sex and the shifting biodiversity  
479 dynamics of marine animals in deep time. *Proceedings of the National*  
480 *Academy of Sciences*, **113**, 14073–14078.
- 481 Caswell, H. (2001) *Matrix Population Models: Construction, Analysis, and*  
482 *Interpretation*, 2nd edn. Sinauer Associates.
- 483 Conde, D.A., Staerk, J., Colchero, F., Silva, R. da, Schöley, J., Baden, H.M.,  
484 Jouvét, L., Fa, J.E., Syed, H., Jongejans, E., Meiri, S., Gaillard, J.-M.,  
485 Chamberlain, S., Wilcken, J., Jones, O.R., Dahlgren, J.P., Steiner, U.K.,  
486 Bland, L.M., Gomez-Mestre, I., Lebreton, J.-D., Vargas, J.G., Flesness,  
487 N., Canudas-Romo, V., Salguero-Gómez, R., Byers, O., Berg, T.B.,  
488 Scheuerlein, A., Devillard, S., Schigel, D.S., Ryder, O.A., Possingham,  
489 H.P., Baudisch, A. & Vaupel, J.W. (2019) Data gaps and opportunities for  
490 comparative and conservation biology. *Proceedings of the National*  
491 *Academy of Sciences*, **116**, 9658–9664.
- 492 Costello, M.J. & Chaudhary, C. (2017) Marine biodiversity, biogeography, deep-  
493 sea gradients, and conservation. *Current Biology*, **27**, R511–R527.
- 494 Dawson, M.N. & Hamner, W.M. (2008) A biophysical perspective on dispersal  
495 and the geography of evolution in marine and terrestrial systems. *Journal*  
496 *of the Royal Society, Interface / the Royal Society*, **5**, 135–150.
- 497 Franco, M. & Silvertown, J. (2004) A comparative demography of plants based  
498 upon elasticities of vital rates. *Ecology*, **85**, 531–538.
- 499 Freckleton, R.P. (2000) Phylogenetic tests of ecological and evolutionary  
500 hypotheses: Checking for phylogenetic independence. *Functional*  
501 *Ecology*, **14**, 129–134.
- 502 Gaillard, J.-M., Pontier, D., Allainé, D., Lebreton, J.D., Trouvilliez, J. & Clobert,  
503 J. (1989) An analysis of demographic tactics in birds and mammals.  
504 *Oikos*, **56**, 59–76.
- 505 Gearty, W., McClain, C.R. & Payne, J.L. (2018) Energetic tradeoffs control the  
506 size distribution of aquatic mammals. *Proceedings of the National*  
507 *Academy of Sciences*, **115**, 4194–4199.
- 508 Griffith, A.B. (2010) Positive effects of native shrubs on *Bromus tectorum*  
509 demography. *Ecology*, **91**, 141–154.
- 510 Grime, J.P. & Pierce, S. (2012) *The evolutionary strategies that shape*  
511 *ecosystems*, John Wiley & Sons.
- 512 Grosberg, R.K., Vermeij, G.J. & Wainwright, P.C. (2012) Biodiversity in water  
513 and on land. *Current Biology*, **22**, R900–R903.
- 514 Hinchliff, C.E., Smith, S.A., Allman, J.F., Burleigh, J.G., Chaudhary, R., Coghill,  
515 L.M., Crandall, K.A., Deng, J., Drew, B.T., Gazis, R., Gude, K., Hibbett,

- 516 D.S., Katz, L.A., Laughinghouse, H.D., McTavish, E.J., Midford, P.E.,  
517 Owen, C.L., Ree, R.H., Rees, J.A., Soltis, D.E., Williams, T. & Cranston,  
518 K.A. (2015) Synthesis of phylogeny and taxonomy into a comprehensive  
519 tree of life. *Proceedings of the National Academy of Sciences*, **112**,  
520 12764–12769.
- 521 Honaker, J., King, G. & Blackwell, M. (2011) Amelia II: A program for missing  
522 data. *Journal of Statistical Software*, **45**, 1–2.
- 523 Jochum, K.P., Wang, X., Vennemann, T.W., Sinha, B. & Müller, W.E.G. (2012)  
524 Siliceous deep-sea sponge *Monorhaphis chuni*: A potential paleoclimate  
525 archive in ancient animals. *Chemical Geology*, **300–301**, 143–151.
- 526 Jones, O.R., Scheuerlein, A., Salguero-Gómez, R., Camarda, C.G., Schaible,  
527 R., Casper, B.B., Dahlgren, J.P., Ehrlén, J., García, M.B., Menges, E.S.,  
528 Quintana-Ascencio, P.F., Caswell, H., Baudisch, A. & Vaupel, J.W.  
529 (2014) Diversity of ageing across the tree of life. *Nature*, **505**, 169–73.
- 530 Kenrick, P. & Crane, P.R. (1997) The origin and early evolution of plants on  
531 land. *Nature*, **389**, 33–39.
- 532 Lande, R., Engen, S. & Sæther, B.-E. (2017) Evolution of stochastic  
533 demography with life history tradeoffs in density-dependent age-  
534 structured populations. *Proceedings of the National Academy of  
535 Sciences*, **114**, 11582–11590.
- 536 Legendre, P. & Legendre, L. (2012) *Numerical Ecology*, 3rd edn. Elsevier  
537 Science, Amsterdam.
- 538 Maddison, W.P. & Maddison, D.R. (2001) *Mesquite: a modular system for  
539 evolutionary analysis*.
- 540 McCauley, D.J., Pinsky, M.L., Palumbi, S.R., Estes, J. a., Joyce, F.H. & Warner,  
541 R.R. (2015) Marine defaunation: Animal loss in the global ocean.  
542 *Science*, **347**, 247–254.
- 543 McDonald, J.L., Franco, M., Townley, S., Ezard, T.H.G., Jelbert, K. & Hodgson,  
544 D.J. (2017) Divergent demographic strategies of plants in variable  
545 environments. *Nature Ecology and Evolution*, **1**, 29.
- 546 Michonneau, F., Brown, J. & Winter, D. (2016) rotl: An R package to interact  
547 with the Open Tree of Life data. *Methods in Ecology and Evolution*, **7**, 1–  
548 17.
- 549 Midford, P., Garland Jr, T. & Maddison, W. (2005) PDAP package of Mesquite.
- 550 Morris, W.F., Pfister, C.A., Tuljapurkar, S., Haridas, C.V., Boggs, C.L., Boyce,  
551 M.S., Bruna, E.M., Church, D.R., Coulson, T., Doak, D.F., Forsyth, S.,  
552 Gaillard, J.-M., Horvitz, C.C., Kalisz, S., Kendall, B.E., Knight, T.M., Lee,  
553 C.T. & Menges, E.S. (2008) Longevity Can Buffer Plant and Animal  
554 Populations Against Changing Climatic Variability. *Ecology*, **89**, 19–25.
- 555 Nielsen, J., Hedeholm, R.B., Heinemeier, J., Bushnell, P.G., Christiansen, J.S.,  
556 Olsen, J., Ramsey, C.B., Brill, R.W., Simon, M., Steffensen, K.F. &  
557 Steffensen, J.F. (2016) Eye lens radiocarbon reveals centuries of  
558 longevity in the Greenland shark (*Somniosus microcephalus*). *Science*,  
559 **353**, 702–704.
- 560 Paniw, M., Maag, N., Cozzi, G., Clutton-Brock, T. & Ozgul, A. (2019) Life history  
561 responses of meerkats to seasonal changes in extreme environments.  
562 *Science*, **363**, 631–635.
- 563 Paradis, E., Claude, J. & Strimmer, K. (2004) APE: Analyses of phylogenetics  
564 and evolution in R language. *Bioinformatics*, **20**, 289–290.



- 565 Peñuelas, J. & Munné-Bosch, S. (2010) Potentially immortal? *New Phytologist*,  
566 **187**, 564–567.
- 567 Pinheiro, J., Bates, D., Debroy, S., Sarkar D & R Core Team (2014) nlme:  
568 Linear and nonlinear mixed effects models. *R package version 3.1-117*.
- 569 Pinsky, M.L., Eikeset, A.M., McCauley, D.J., Payne, J.L. & Sunday, J.M. (2019)  
570 Greater vulnerability to warming of marine versus terrestrial ectotherms.  
571 *Nature*, **569**, 108.
- 572 R Core Team (2015) R: a language and environment for statistical computing.
- 573 Revell, L.J. (2010) Phylogenetic signal and linear regression on species data.  
574 *Methods in Ecology and Evolution*, **1**, 319–329.
- 575 Revell, L.J. (2012) phytools: An R package for phylogenetic comparative  
576 biology (and other things). *Methods in Ecology and Evolution*, **3**, 217–  
577 223.
- 578 Revell, L.J. (2009) Size-correction and principal components for interspecific  
579 comparative studies. *Evolution*, **63**, 3258–3268.
- 580 Reynolds, C. (2006) *Ecology of Phytoplankton*, Cambridge University Press,  
581 Cambridge.
- 582 Ruokolainen, L., Lindén, A., Kaitala, V. & Fowler, M.S. (2009) Ecological and  
583 evolutionary dynamics under coloured environmental variation. *Trends in*  
584 *Ecology & Evolution*, **24**, 555–563.
- 585 Salguero-Gómez, R., Jones, O.R., Archer, C.R., Bein, C., de Buhr, H., Farack,  
586 C., Gottschalk, F., Hartmann, A., Henning, A., Hoppe, G., Römer, G.,  
587 Ruoff, T., Sommer, V., Wille, J., Voigt, J., Zeh, S., Vieregg, D., Buckley,  
588 Y.M., Che-Castaldo, J., Hodgson, D., Scheuerlein, A., Caswell, H. &  
589 Vaupel, J.W. (2016a) COMADRE: A global data base of animal  
590 demography. *Journal of Animal Ecology*, **85**, 371–384.
- 591 Salguero-Gómez, R., Jones, O.R., Archer, C.R., Buckley, Y.M., Che-Castaldo,  
592 J., Caswell, H., Hodgson, D., Scheuerlein, A., Conde, D.A., Brinks, E., de  
593 Buhr, H., Farack, C., Gottschalk, F., Hartmann, A., Henning, A., Hoppe,  
594 G., Römer, G., Runge, J., Ruoff, T., Wille, J., Zeh, S., Davison, R.,  
595 Vieregg, D., Baudisch, A., Altwegg, R., Colchero, F., Dong, M., de Kroon,  
596 H., Lebreton, J.-D., Metcalf, C.J.E., Neel, M.M., Parker, I.M., Takada, T.,  
597 Valverde, T., Vélez-Espino, L.A., Wardle, G.M., Franco, M. & Vaupel,  
598 J.W. (2015) The COMPADRE Plant Matrix Database: An open online  
599 repository for plant demography. *Journal of Ecology*, **103**, 202–218.
- 600 Salguero-Gómez, R., Jones, O.R., Jongejans, E., Blomberg, S.P., Hodgson,  
601 D.J., Mbeau-Ache, C., Zuidema, P.A., De Kroon, H. & Buckley, Y.M.  
602 (2016b) Fast–slow continuum and reproductive strategies structure plant  
603 life-history variation worldwide. *Proceedings of the National Academy of*  
604 *Sciences*, **113**, 230–235.
- 605 Stearns, S.C. (1992) *The Evolution of Life Histories*, Oxford University Press,  
606 New York.
- 607 Steele, J.H., Brink, K.H. & Scott, B.E. (2019) Comparison of marine and  
608 terrestrial ecosystems: suggestions of an evolutionary perspective  
609 influenced by environmental variation. *ICES Journal of Marine Science*,  
610 **76**, 50–59.
- 611 Strathmann, R.R. (1990) Why life histories evolve differently in the sea.  
612 *American Zoologist*, **30**, 197–207.
- 613 Uhlenbeck, G.E. & Ornstein, L.S. (1930) On the Theory of the Brownian Motion.  
614 *Phys. Rev.*, **36**, 823–841.

- 615 Vermeij, G.J. & Grosberg, R.K. (2017) Rarity and persistence. *Ecology Letters*,  
616 **21**, 3–8.
- 617 Webb, T.J. (2012) Marine and terrestrial ecology: Unifying concepts, revealing  
618 differences. *Trends in Ecology and Evolution*, **27**, 535–541.
- 619 Webb, T.J. & Mindel, B.L. (2015) Global patterns of extinction risk in marine and  
620 non-marine systems. *Current Biology*, **25**, 506–511.
- 621 Welch, B.L. (1947) The generalization of “Student’s” problem when several  
622 different population variances are involved. *Biometrika*, **34**, 28–35.
- 623 Westoby, M. (1998) A leaf-height-seed (LHS) plant ecology strategy scheme.  
624 *Plant and soil*, **199**, 213–227.
- 625 Winemiller, K.O. & Rose, K.A. (1992) Patterns of life-history diversification in  
626 North American fishes: implications for population regulation. *Canadian*  
627 *Journal of Fisheries and aquatic sciences*, **49**, 2196–2218.  
628



629 *Acknowledgements:* We thank T. Coulson, H. Possingham, O. Jones, and F.  
630 Colchero for feedback to early versions of the manuscript, and the Max Planck  
631 Institute for Demographic Research for the development of and access to the  
632 COMPADRE and COMADRE databases. P.C. was supported by a FI-DRG  
633 grant from the Generalitat de Catalunya, the Smart project (CGL2012-32194)  
634 funded by the Spanish Ministry of Economy and Innovation and by a Ramón  
635 Areces Foundation Postdoctoral Scholarship. M.B. was supported by ARC  
636 CE110001014, a University Academic Fellowship by the University of Leeds,  
637 and EU MSCA DLV-747102. This research emerged through funding by ARC  
638 DE140100505 and NERC R/142195-11-1 to R.S-G.

639 *Data accessibility statement:* Matrix population models are available at  
640 [www.compadre-db.org](http://www.compadre-db.org).

641

642 **Table 1. Life history traits used in the comparative analyses of 638**  
 643 **terrestrial and 117 aquatic species to examine differences in strategies**  
 644 **between both realms, together with their loadings on the first two**  
 645 **principal component axes, grouped by their attribution to turnover,**  
 646 **survival, development, or reproduction.** Pagel's  $\lambda$  (and its associated  $P$ -  
 647 value) describes the strength of phylogenetic inertia, ranging between 1, when  
 648 life history trait differences are entirely due to the phylogenetic structure of the  
 649 data under Brownian motion, and 0, meaning no phylogenetic structuring in the  
 650 pattern. The mean loading values of each life history trait are visually depicted  
 651 in Figure 2A. SE values were calculated via 10 imputations (See Methods). Bold  
 652 numbers indicate traits loadings above 55% for each PC.

| Life history traits      | Phylogenetic signal |            | PC 1        | PC 2              |                  |
|--------------------------|---------------------|------------|-------------|-------------------|------------------|
|                          | Pagel's $\lambda$   | $P$ -value | 47.42±0.34% | 21.02±0.11%       |                  |
| Generation time          | $T$                 | 0.57       | <0.01       | <b>0.83±0.00</b>  | -0.08±0.01       |
| Rate of senescence       | $H$                 | 0.48       | <0.01       | <b>0.72±0.01</b>  | 0.24±0.01        |
| Age at maturity          | $L_\alpha$          | 0.52       | <0.01       | <b>0.80±0.00</b>  | -0.11±0.01       |
| Development              | $\gamma$            | 0.71       | <0.01       | <b>-0.73±0.00</b> | -0.11±0.01       |
| Mean sexual reproduction | $\phi$              | 0.32       | <0.01       | <b>-0.69±0.01</b> | 0.51±0.01        |
| Degree of iteroparity    | $S$                 | 0.11       | <0.01       | 0.18±0.02         | <b>0.92±0.00</b> |

653 **Figure 1. Trade-offs among life history traits are congruent between**  
654 **aquatic and terrestrial environments.** Pair-wise correlations between seven  
655 life history traits (Table S4) for 117 aquatic (blue) and 638 terrestrial (brown)  
656 species. Arrows indicate the direction of each pair-wise correlation using  
657 phylogenetic generalised least squares: positive (arrow-up), negative (arrow-  
658 down) or not-significant correlation (horizontal bar;  $P>0.05$ ). The mean  
659 phylogenetic signal (Pagel's  $\lambda$ ) of each pair-wise correlation, displayed in the  
660 lower-triangle, ranges from weak (white,  $\sim 0.1$ ) to strong (dark green,  $\sim 0.9$ ).

661 **Figure 2. Aquatic and terrestrial life history strategies are organised in two**  
662 **main axes of variation, the fast-slow continuum and the reproductive**  
663 **strategies.** Phylogenetically-corrected principal component analysis (pPCA) for  
664 the first two axes (percentage of variance absorbed in brackets) for seven key  
665 life history traits from 117 aquatic (blue) and 638 terrestrial species (brown).  
666 Arrow lengths indicate mean loading of each life history trait, and colour  
667 indicates associations with population turn-over (black), survival (green),  
668 development (dark blue), and reproduction (red). Each point represents the  
669 mean position of a species on this two-dimensional space for 10 imputed data  
670 sets (see Methods). Violin plots (top and right) depict the distribution of species  
671 along each PC axis; white dot: mean; black thick line: 25<sup>th</sup>-75<sup>th</sup> quantile; black  
672 thin line: SD; ns: not-significant; \*:  $P<0.01$ ; \*\*:  $P<0.005$ . The silhouettes, starting  
673 at the top left, and counter-clock-wise, correspond to: *Lantana camara*,  
674 *Clinostomus funduloides*, *Solidago mollis*, *Setophaga cerulea*, *Mazzaella*  
675 *splendens*, *Mirounga leonina*, *Gorilla beringei*, *Paramuricea clavata*,  
676 *Pseudomitrocereus fulviceps*, *Chlorocardium rodiei*, *Orcinus orca*, *Cypripedium*  
677 *calceolus* and *Gracilaria gracilis*.

678 **Figure 3. The main axes of life history variation remain constant,**  
679 **regardless of the degree mobility/sessility or taxonomic kingdom.**

680 Phylogenetically-corrected principal component analysis of seven life history  
681 traits across 683 species. Trait definition in Figure 2 and Table S4. Note that the  
682 fast-slow continuum remains the dominant axis of variation, explaining 40-45%  
683 of the variation, followed by an axis of reproductive strategies, which explains  
684 20-22% of the variation in life history traits. ns: not-significant; \*:  $P < 0.05$ ; \*\*:  
685  $P < 0.01$ . (a) Sessile organisms, with silhouettes (not to scale; starting at the top  
686 left, and counter-clock-wise) representing: *Lantana camara*, *Mya arenaria*,  
687 *Mazzalena splendens*, *Paramuricea clavata*, *Chlorocardium rodiei* and  
688 *Cypridium calceolus*. (b) Mobile organisms: *Clinostomus funduloides*,  
689 *Setophaga cerulea*, *Chelydra serpentine*, *Elephas maximus* and *Isurus*  
690 *oxyrinchus* (c) Kingdoms Plantae and Chromista: *L. camara*, *Pterygophora*  
691 *caliphornica*, *M. splendens* *C. rodiei* and *C. calceolus*. (d) Kingdom Animalia: *M.*  
692 *arenaria*, *C. funduloides*, *S. cerulea*, *Gorilla beringei*, *P. clavata* and *E.*  
693 *maximus*.

694

695 **Figure 1**

696

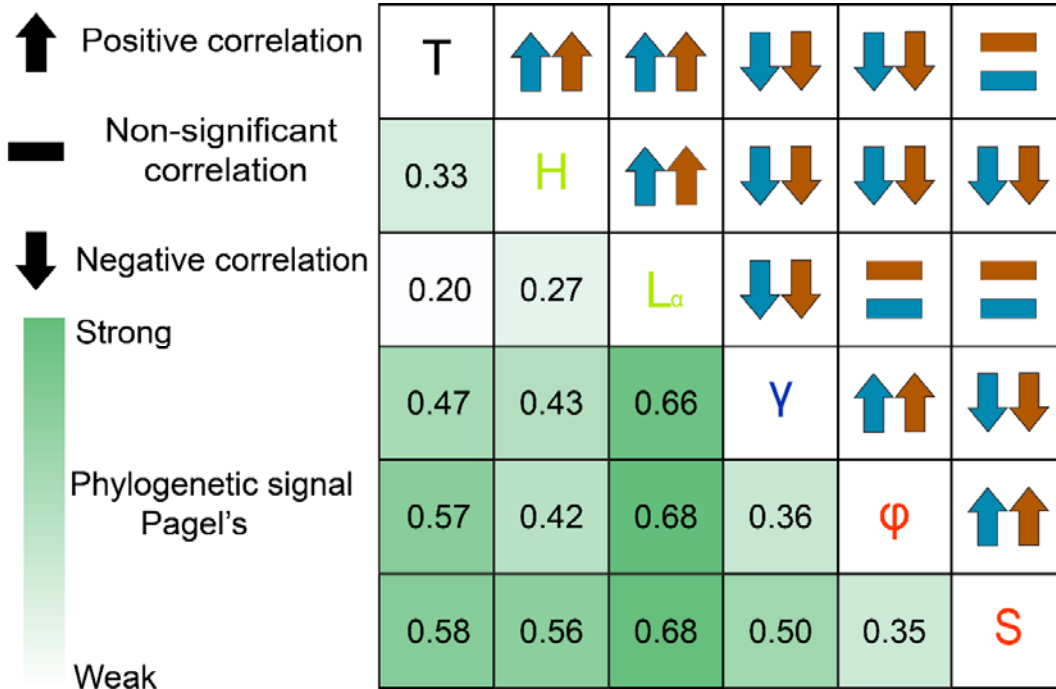

697

698

699 **Figure 2**

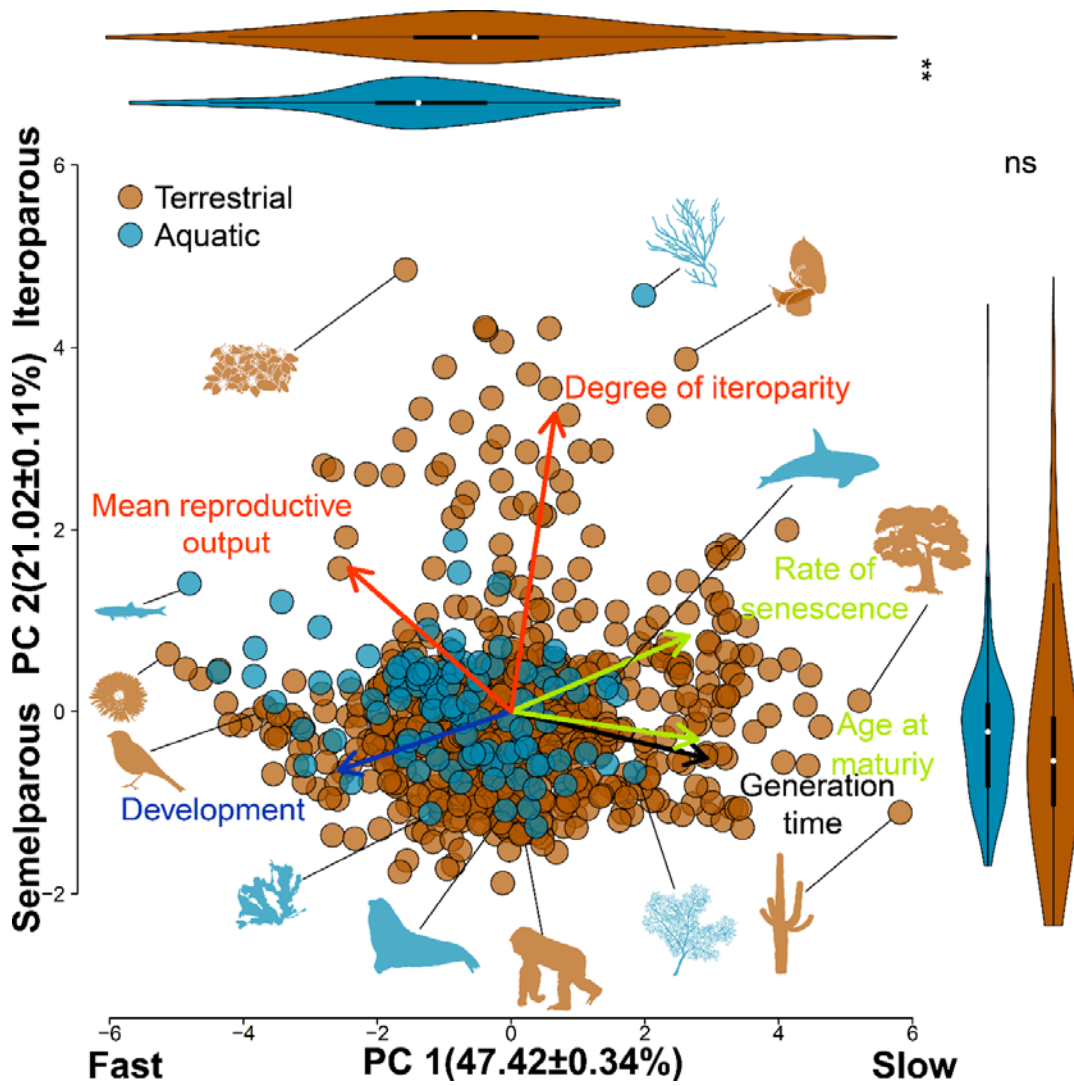

700

701

702 **Figure 3**

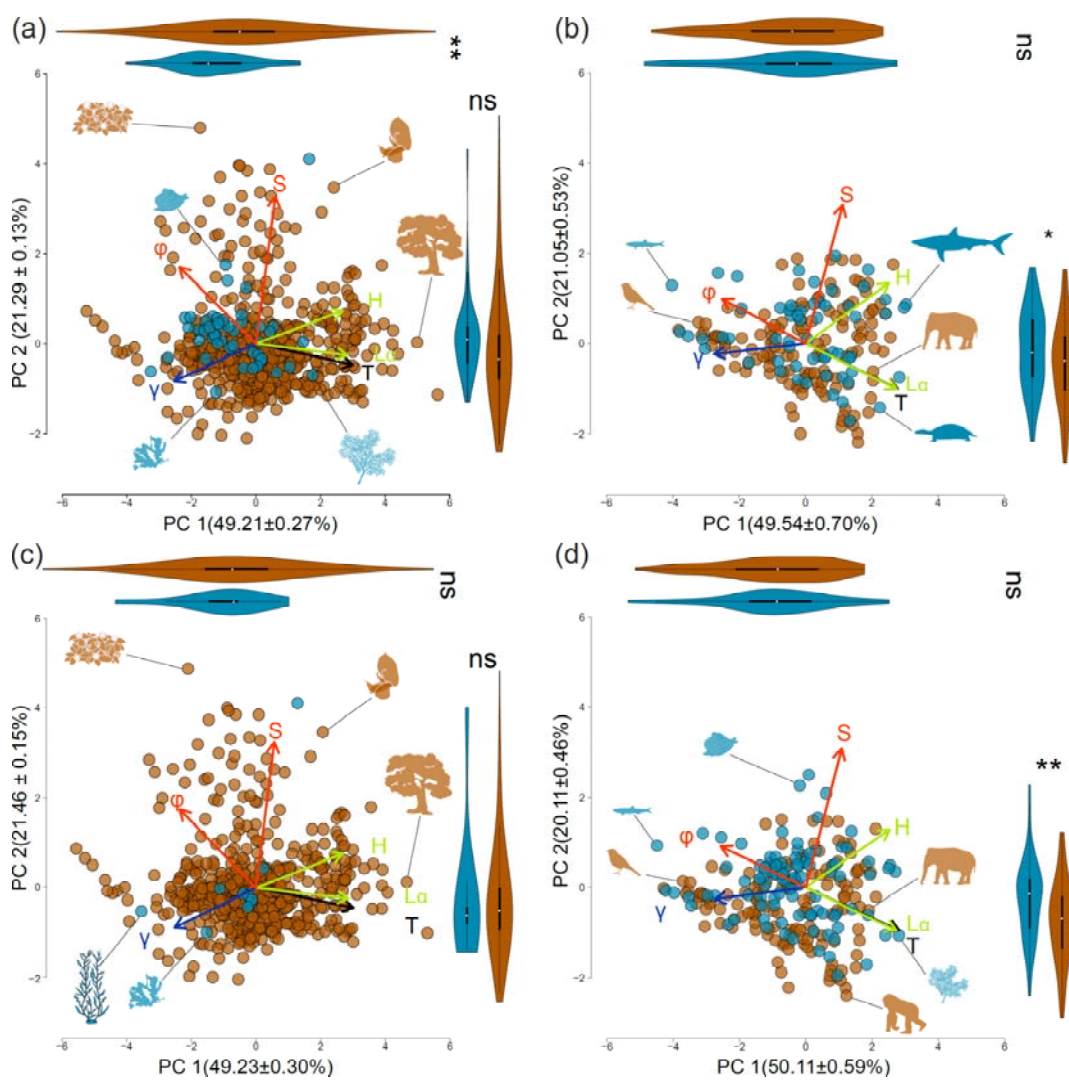

703

704
